# Supplementary material for: CpG signalling, H2A.Z/H3 acetylation and microRNA-mediated deferred self-attenuation orchestrate foetal NOS3 expression
Source: PubMed Central journal article supplement (PMC4333899; doi:10.1186/s13148-014-0042-4), 2015-02-08
Supplement: 13148_2014_42_MOESM4_ESM.pdf [file 13148_2014_42_MOESM4_ESM.pdf]

Orangutan/1-1461 1 GTGCGG-----CCGGCCAGCGAGTGAGAGACCCGGGCGCTACCAAAGGGGAG  
Gorilla/1-1349 1 GTGCGG-----CTGGCCAGCGACTGAGAGACCCGGGCGCTACCAAAGGGGAG  
Chimpanzee/1-1404 1 GTGCGG-----CTGGCCAGCGACTGAGAGACCCGGGCGCTACCAAAGGGGAG  
Human/1-1431 1 GTGCGG-----CTGGCCAGCGACTGAGAGACCCGGGCGCTACCAAAGGGGAG  
Gibbon/1-1400 1 GTGCGG-----CCAGCCAGCGAGTGAGAGACCCGGGCGCTACCAAAGGGGAG  
Baboon/1-1380 1 GTGGGGGAAGCTGCAGGTGAGGCCAGCGAGCAGAGAGCCAGGCCTACTAAAAGGGGAG  
Rhesus/1-1376 1 GTGGGGGAAGCTGCAGGTGAGGCCAGCGAGCAGAGAGCCAGGCCTACTAAAAGGGGAG  
Tarsier/1-1346 1 GTGGGGGAAGTTGCAGGTTGGCCAGTCAGAGGGAAC----TGCGGGACAAAAGGGGAG  
Marmoset/1-1351 1 GTGGGGGAAGCTGCAGGTGTGGCCAGTGAG-----ACCCAGGCGGGACAAAAGGGGAG  
Squirr mky/1-1332 1 GTGGGGGAAGCTGCAGGTGCGGACAGCGAG-----ACCCAGGCAAGGCAGAAAGGGGGG

Orangutan/1-1461 49 CGGGGTGGTGGGGCAGTTCCTAAGGCTTCCCAGGGGCTAGGAGGTCCCAAACAATGGGGG  
Gorilla/1-1349 49 CGGGGTGGCGGGGCAGTTCCTAAGGCTTCCCAGGGGCTGGGAGGTCCCAAACAATGGGGG  
Chimpanzee/1-1404 49 CGGGGTGGCGGGGCAGTTCCTAAGGCTTCTTGGGGGCTGGGAGGTCCCAAACATGGGGG  
Human/1-1431 49 CGGGGTGGCGGGGCAGTTCCTAAGGCTTCCCAGGGGCTGGGAGGTCCCAAACGTGGGGG  
Gibbon/1-1400 49 CGGGGTGGCGGGGCAGTTTCTAAGGCTTCCCCAGGGGCTGGGAGGTCCCAAACAATGGGGG  
Baboon/1-1380 61 CGGGGTGGCGGGGCAGTTCCTGAGGCTTCCCAGGGACCGGGAGGTCCCAAACAGTGGGGG  
Rhesus/1-1376 61 CGGGGTGGCGGGGCAGTTCCTGAGGCTTCCCAGGGACCGGGAGGTCCCAAACAGTGGGGG  
Tarsier/1-1346 57 AGGAGGGGTTGAGCAGCTCCTGAGGTTTTCT-GGG-----CTTCCAAGCAGTGGGGG  
Marmoset/1-1351 56 CGGGGTGTGGGGCGGTTTCCTGAGGCTTCCCAGGGAATAGGGGTCTCAAACAGTGGGGG  
Squirr mky/1-1332 56 TGGGGTGGC-AGGTAGTTCCTGAGGCTTCCCAGGGACTAGGGGTCCCAAACAGTGGGGG

Orangutan/1-1461 109 AGATCCTTGCCTGTTCCCTTAGAGACTGGAAAGGTAG-GGAGACC-GCCCCACTCTCAGC  
Gorilla/1-1349 109 AGATCCTTGCCTGTTCCCTTAGAGACTGGAAAGGTAG-GAGGACT-GCCCCACCCTCAGC  
Chimpanzee/1-1404 109 AGATCCTTGCCTTTTCCCTTAGAGACTGGAAAGGTAG-GGGGACT-GCCCCACCCTCAGC  
Human/1-1431 109 AGATCCTTGCCTTTTCCCTTAGAGACTGGAAAGGTAG-GGGGACT-GCCCCACCCTCAGC  
Gibbon/1-1400 109 AGATCCTTGCCTGTTCCCTTAGAGACTGGAAAGGTAG-GGGGACC-GCCCCACTCTCAGC  
Baboon/1-1380 121 AGATCCTTGCCTGTTCCCTTAGAGACGGAAAGGTAG-GGGGACC-GCCCCACCCTCAGC  
Rhesus/1-1376 121 AGATCCTTGCCTGTTCCCTTAGAGACGGAAAGGTAG-GGGGACC-GCCCCACCCTCAGC  
Tarsier/1-1346 108 AGATCCCTGTCTGTTCCCTCAGAGACTGGAAAAGTAA-GGGGTCCAGCCCTACCCTCAGC  
Marmoset/1-1351 116 AGATCGCTGCCTGTTCCCTTAGAGACTAGAAAGGTAGAGGGGCT--GCCCCACCCTCAGC  
Squirr mky/1-1332 115 AGATCTCTGCCTGTTCCCTTAGAGACTAGAAAGGTAGAGGGGCT--GCCCCACCCTCAGC

Orangutan/1-1461 167 -ACCCAGGGGAACCTCAGCCCAGTAGTGAGGAC-----  
Gorilla/1-1349 167 -ACCCAGGGGAACCTCAGCCCAGTAGTGAAGAC-----  
Chimpanzee/1-1404 167 -ACCCAGGGGAACCTCAGCCCAGTAGTGAAGAC-----  
Human/1-1431 167 -ACCCAGGGGAACCTCAGCCCAGTAGTGAAGAC-----  
Gibbon/1-1400 167 -ACCCAGGGGAACCTCAGCCCAGTAGTGAAGACCTGCTGCTGCAGGCCCCAGATGAGCCC  
Baboon/1-1380 179 -ACCCAGGGGAACCTCAACCCAGTAGTGAAGAC-----  
Rhesus/1-1376 179 -ACCCAGGGGAACCTCAACCCAGTAGTGAAGAC-----  
Tarsier/1-1346 167 TGTCTGGGGATCCTCAGCCCAGTAGCTAACAG-----  
Marmoset/1-1351 174 -ACCCAGGGGAACCTCAGTCCAGTAGTAAAGAC-----  
Squirr mky/1-1332 173 -ACCCAGGGGAACCTTAGTCCAGTAGTAAAGAC-----

Orangutan/1-1461 199 -----  
Gorilla/1-1349 199 -----  
Chimpanzee/1-1404 199 -----  
Human/1-1431 199 -----  
Gibbon/1-1400 226 CCAGAACTCTTCCCTTCTGCCCCCGAGCTGGTCTTGAGGTGCCCTGGAGCACCCACG  
Baboon/1-1380 211 -----  
Rhesus/1-1376 211 -----  
Tarsier/1-1346 200 -----  
Marmoset/1-1351 206 -----  
Squirr mky/1-1332 205 -----

Orangutan/1-1461 199 -----  
Gorilla/1-1349 199 -----  
Chimpanzee/1-1404 199 -----  
Human/1-1431 199 -----  
Gibbon/1-1400 286 TGAGCACCAAAGGGATTGACTGGGTAGGATGGAGGGGGCCATCCCTGAGCCTCTCAAGAA  
Baboon/1-1380 211 -----

Rhesus/1-1376 211 -----  
Tarsier/1-1346 200 -----  
Marmoset/1-1351 206 -----  
Squirr mky/1-1332 205 -----

Orangutan/1-1461 199 -----  
Gorilla/1-1349 199 -----  
Chimpanzee/1-1404 199 -----  
Human/1-1431 199 -----  
Gibbon/1-1400 346 GGGCCTGCAAGGGGGTGCATCCACACCCCAACACCCCCAGGCTGGAGTGGTTTGCAG  
Baboon/1-1380 211 -----  
Rhesus/1-1376 211 -----  
Tarsier/1-1346 200 -----  
Marmoset/1-1351 206 -----  
Squirr mky/1-1332 205 -----

Orangutan/1-1461 199 -----CTGGTTATCAGGC  
Gorilla/1-1349 199 -----CTGGTTATCAGGC  
Chimpanzee/1-1404 199 -----CTGGTTATCAGGC  
Human/1-1431 199 -----CTGGTTATCAGGC  
Gibbon/1-1400 406 CCCTGGGCCTGCGCTGGTGCACCCTCCCGGCAGTGTCCAACATGCTGCTGGGTATTAGGC  
Baboon/1-1380 211 -----CTGGTTATTAGGC  
Rhesus/1-1376 211 -----CTGGTTATTAGGC  
Tarsier/1-1346 200 -----CTGGTTATTAAGC  
Marmoset/1-1351 206 -----CTGGTTATTAAGC  
Squirr mky/1-1332 205 -----CTGGTTATTAAGC

\*\*\*\*\*

Orangutan/1-1461 212 CCTATGGTAGTGCCTTGGCTGGAGGAGGGGAAAGAAGTCTAGATCTGCTGCAGGGGTGAG  
Gorilla/1-1349 212 CCTATGGTAGTGCCTTGGCTGGAGGAGGGGAAAGAAGTCTAGACCTGCTGCAGGGGTGAG  
Chimpanzee/1-1404 212 CCTATGGTAGTGCCTTGGCTGGAGGAGGGGAAAGAAGTCTAGACCTGCTGCAGGGGTGAG  
Human/1-1431 212 CCTATGGTAGTGCCTTGGCTGGAGGAGGGGAAAGAAGTCTAGACCTGCTGCAGGGGTGAG  
Gibbon/1-1400 466 CCTATGGTAGTGCCTTGGCTAGAGGAGGGGAAA-----  
Baboon/1-1380 224 CCTATGGTAGTGCCTTGGCTAGAGGAGGGGAAA-----  
Rhesus/1-1376 224 CCTATGGTAGTGCCTTGGCTGGAGGAGGCCAAA-----  
Tarsier/1-1346 213 CTAGGGCAATGCATTGCCAGAAATAGGGGGGGCG-----  
Marmoset/1-1351 219 CCTATAGTAGAGCCTTGGCTGGAGGAGGGGA-----  
Squirr mky/1-1332 218 CCTGCGGTAGCGCCTTGGCTGGACGAGGGGA-----

\*\*\*\*\*

Orangutan/1-1461 272 GAAGTCTAGACCTGCTGCAGGGGTGAGGAAGTCTAGACCTGCTGCAGGGGTGAGGAAGTC  
Gorilla/1-1349 272 GAAGTCTAGACCTGCTGCAGGGGTGAG-----  
Chimpanzee/1-1404 272 GAAGTCTAGACCTGCTGCAGGGGTGAGGAAGTCTAGACCTGCTGCAGGGGTGAGGAAGTC  
Human/1-1431 272 GAAGTCTAGACCTGCTGCAGGGGTGAGGAAGTCTAGACCTGCTGCAGGGGTGAGGAAGTC  
Gibbon/1-1400 499 -----  
Baboon/1-1380 257 -----  
Rhesus/1-1376 257 -----  
Tarsier/1-1346 249 -----  
Marmoset/1-1351 250 -----  
Squirr mky/1-1332 249 -----

\*\*\*\*\*

Orangutan/1-1461 332 TAGACCTGCTGCAGGGGTGAGGAAGTCTAGACCTGCTGCAGGGGTGAGGAAGTCTAGA-C  
Gorilla/1-1349 299 -----  
Chimpanzee/1-1404 332 TAGACCTGCTGCAGGGGTGAG-----GAAGTCTAGA-C  
Human/1-1431 332 TAGACCTGCTGCAGGGGTGAG-----GATGTCTAGA-C  
Gibbon/1-1400 499 -----GAAGTCTAGA-C  
Baboon/1-1380 257 -----GAAGTCTAGA-C  
Rhesus/1-1376 257 -----GAAGTCTAGA-C  
Tarsier/1-1346 249 -----GAAATCTAGA-C  
Marmoset/1-1351 250 -----GAA-TGTCTAGC  
Squirr mky/1-1332 249 -----GA-GTGTCCAGC

```

++-+++++
Orangutan/1-1461 391 CT-GCTGCAGGGGTGAGGACA-----CCTGGGCGGTGC----TGTCAGTA
Gorilla/1-1349 299 -----GACAGCTGAGCGGAGCTTCCCTGGGCGGTGC----TGTCAGTA
Chimpanzee/1-1404 353 -----GACAGCTGAGCGGAGCTTCCCTGGGCGGTGC----TGTCAGTA
Human/1-1431 364 CT-GCTGCAGGGGTGAGGACAGCTGAGCGGAGCTTCCCTGGGCGGTGC----TGTCAGTA
Gibbon/1-1400 510 CT-GCTGCAGGGGTGAGGACAGCTGAGTGGAGCTTCCCTGGGCGGTGC----TGTCAGTA
Baboon/1-1380 268 CT-GCTGCAGGGGTGAGGACAGCTGAGCGGAGCTTCCCTGGGCGGTGC----TGTCAGTA
Rhesus/1-1376 268 CT-GCTGCAGGGGTGAGGACAGCTGAGCGGAGCTTCCCTGGGCGGTGC----TGTCAGTA
Tarsier/1-1346 260 -TGGCACAGCCCGTGAGGATAGCTGAGCAGTGCTTCCCTGGGATGCTG---TTCAAGTA
Marmoset/1-1351 261 -CCACTCCACGG-TGAGGACAGCTGGGTGCAGCTTCCCCGGGTGGTGGGTGCCGTCAGTA
Squirr mky/1-1332 260 -CCGCTCCACGG-TGAGGACAGCTGGGCGCAGCTTCCCTGGGCGGTGGTGGTGTTCAGTA
Orangutan/1-1461 431 GCAGGAGCAGCCTCCTGGAAAAG-CCCTGGCTGCTGCTTCTCCCCAAGAGAGAAGGCTT
Gorilla/1-1349 338 GCAGGAGCAGCCTCCTGGAAAAG-CCCTGGCTGCTGCTTCTCCCCAAGAGAGAAGGCTT
Chimpanzee/1-1404 392 GCAGGAGCAGCCTCCTGGAAAAG-CCCTGGCTGCTGCTTCTCCCCAAGAGAGAAGGCTT
Human/1-1431 419 GCAGGAGCAGCCTCCTGGAAAAG-CCCTGGCTGCTGCTTCTCCCCAAGAGAGAAGGCTT
Gibbon/1-1400 565 GCAGGAGCAGCCTCCTGGAAAAG-CCCTGGCTGCTGCTTCTCCCCAAGAGAGAAGGCTT
Baboon/1-1380 323 GCAGGAGCAGCCTCCTGGAAAAG-G-CCCTGGCTGCTGCTTCTCCCCAAGGAGAGAAGGCTT
Rhesus/1-1376 323 GCAGGAGCAGCCTCCTGGAAAAG-G-CCCTGGCTGCTGCTTCTCCCCAAGGAGAGAAGGCTT
Tarsier/1-1346 316 ACAGGAGCAGCCTCCTGGAAAAGGCCCTGCCTGCTGCTTCCCTG-----AGG---
Marmoset/1-1351 319 GCAGGAGCGCCCTCCTAGAAAAG-CCCTGGCTGCTGCTTCTCCC-----
Squirr mky/1-1332 318 GCAGGAGCGCCCTCCTGGAAAAG-CCCTGGCTGCTGCTTCTCCC-----

Orangutan/1-1461 490 CTCCTGCCAGGCCAGTCCAGTGCAGCCCCCTCACCGACACCCGCTGCTC----CCCCAGTT
Gorilla/1-1349 397 CTCCCGCCAGGCCAGTCCAGTGCAGCCCCCTCACCCACACCCACTGCTA----CCCCAGTT
Chimpanzee/1-1404 451 CTCCCGCCAGGCCAGTCCAGTGCAGCCCCCTCACCCACACCCACTGCTA----CCCCAGTT
Human/1-1431 478 CTCCCGCCAGGCCAGTCCAGTGCAGCCCCCTCACCCACACCCACTGCTA----CCCCAGTT
Gibbon/1-1400 624 CTCCCGCCAGGCCAGTCCAGTCCAGCCCCCTCACCCATACCCACTGCTC----CCTAGTT
Baboon/1-1380 381 CTCCTGCTAGGCCAGTCCAGTACAGCCCCCTCACCCACACCCGCTGCTC----CCCCAGTT
Rhesus/1-1376 381 CTCCTGCTAGGCCAGTCCAGTGCAGCCCCCTCACCCACACCCGCTGCTC----CCCCAGTT
Tarsier/1-1346 363 -----GTCAGGTCTGCCAACCCGTGCCCTCACCCACACCCATTGCTCCCCTCCCCAGTT
Marmoset/1-1351 362 -----ACCAGGCCAGCCAGTGCAGCCCCCTCACCCACACCCGCTGCTC----CCCCAGCT
Squirr mky/1-1332 361 -----ACCAGGCCAGCCAGTGCAGCCCCCTCACCCACACCCAGTGTCTC---CCACAGTT

Orangutan/1-1461 546 CCCCTGCCTCGGCCCGCACCCGCCCTCACACCCCAGCCACAGACTCGGGGCTGGCCTTG
Gorilla/1-1349 453 CCCCTGCTTCGGCCCGCACCCCTCCCTCACACCCCAGCCACAGACTCGGGGCTGGCCTTG
Chimpanzee/1-1404 507 CCCCTGCTTCGGCCCGCACCCCTCCCTCACACCCCAGCCACAGACTCGGGGCTGGCCTTG
Human/1-1431 534 CCCCTGCTTCGGCCCGCACCCCTCCCTCACACCCCAGCCACAGACTCGGGGCTGGCCTTA
Gibbon/1-1400 680 CCCCTGCCTCAGCCCGCACCCCTCCCTCACACCCCAGCCACAGACTCGGGGCTGGCCTTG
Baboon/1-1380 437 CCCCTGCCTCGACGTGCACCCCTCCCTCACACCCCAGCCACAGACTCGGGGCTGGCCTTG
Rhesus/1-1376 437 CCCCTGCCTCGACGTGCACCCCTCCCTCACACCCCAGCCACAGACTCGGGGCTAGCCTTG
Tarsier/1-1346 418 CTCCTGCCTCGACCTGGACCC-----GTAGGCTCAGGGCTGGCCTGG
Marmoset/1-1351 414 CCCCTGCCCAAGCCCGCACCC--CCTCACACCCCAGCCACAGACTCAGAGCTGGCCTCA
Squirr mky/1-1332 413 CCCCTGCCCAAGCCCAACCC-CCACACACCTCAGCCACAGACTCAGTGGTGGCCTCG

Orangutan/1-1461 606 GTTACTGGAAC-GCCTGTGACCACAGCACTAAGAGAAGCAAGCTGCCCCATGGGGAAC-T
Gorilla/1-1349 513 GTTACTGGAAC-GCCTGTGACCACAGCACTAAGAGAAGCAAGCTGCCCCATGGGGGAC-T
Chimpanzee/1-1404 567 GTTACTGGAAC-GCCTGTGACCACAGCACTAAGAGAAGCAAGCTGCCCCATGGGGGAC-T
Human/1-1431 594 GTTACTGGAAC-GCCTGTGACCACAGCACTAAGAGAAGCAAGCTGCCCCATGGGGGAC-T
Gibbon/1-1400 740 GTTACTGGAAT-GCTGTGACCACAGTACTAAGAGAAGCAAGCTGCCCCATGGGGGAC-T
Baboon/1-1380 497 GTTACTGGAACAGCCTGTGACCACAGCACTGAGAGAAGCAAGCTGCCCCATGGGGGAC-T
Rhesus/1-1376 497 GTTACTGGAACAGCCTGTGAGCACAGCACTGAGAGAAGCAAGCTGCCCCATGGGGGAC-T
Tarsier/1-1346 460 GTTATTGAG-CAGCCTGTGCCATGGCACTAAGAGAAGCAAGCTGACCCATAAGGGAA--
Marmoset/1-1351 472 GTTGTAGAACAGCCTGTGACCACAGCACTAAGAGAAGCAAGCTGCCCCATGGGGGAA-C
Squirr mky/1-1332 472 ATCACTAGAACAGCCTGTGCCACGGCACTAAGAGAAGCAAGCTGCCCCATGGGGGAAAC

Orangutan/1-1461 664 -GGTCCCACGGCCTCGGCCTCCTTCACCATC--ACTGGCCGCCAAA----GAGTTTGAAA
Gorilla/1-1349 571 TGGTCCCATGGCCTTGGCCTCCTTCACCATC--ACTGGCCGCCAAA----GAGTTTGAAA
Chimpanzee/1-1404 625 TGGTCCCATGGCCTTGGCCTCCTTCACCATC--ACTGGCCGCCAAA----GAGTTTGAAA
Human/1-1431 652 TGGTCCCATGGCCTTGGCCTCCTTCACCATC--ACTGGCCGCCAAA----GAGTTTGAAA
Gibbon/1-1400 798 TG-----
Baboon/1-1380 556 TGGTCCCATGGCCTTGGCCTCCTTCACCATC--ACTGGCCGCCAAA----GAGTTTGAAA
Rhesus/1-1376 556 TGGTCCCATGGCCTTGGCCTCCTTCACCATC--ACTGGCCGCCAAA----GAGTTTGAAA

```

Tarsier/1-1346 517 TCAGCCCATGATCTTGGCCTCCTTGGCTGTA--ACTGGCCACAAA----GAACTTGGAG  
Marmoset/1-1351 531 TGCACCTACAGCCTTGACCTCCTTCACTGGC---CTGGCCGCAAAA----GAGTTTGGAA  
Squirr mky/1-1332 532 TGCACCTACGGCCTTGACCTTCTCCGCCACTGGACTGGCCACAAA AAAAGAGTTTGGAA

Orangutan/1-1461 717 TAAAGCCACGTGCCAGTGAATCCCAAGGAACTCAAATAAAAATAAAAACAATCCTATC  
Gorilla/1-1349 625 TAAAGCCACGTGCCAGTGAATCCCAAGGAACTCAAATAAAAATAAAAACAATCCTATC  
Chimpanzee/1-1404 679 TAAAGCCACGTGCCAGTGAATCCCAAGGAACTCAAATAAAAATAAAAACAATCCTATC  
Human/1-1431 706 TAAAGCCACGTGCCAGTGAATCCCAAGGAACTCAAATAAAAATAAAAACAATCCTATC  
Gibbon/1-1400 800 -----  
Baboon/1-1380 610 TAAAGCCACGTGCCAGTGAATCCCAAGGAGCCTCAAATAAAAATAAAAACAATCCTATC  
Rhesus/1-1376 610 TAAAGCCACGTGCCAGTGAATCCCAAGGAGCCTCAAATAAAAATAAAAACAATCCTATC  
Tarsier/1-1346 571 TAAAGCCACATGCTCAGTAAATCCCAAGAGTCTCAAATAAAACAAGAATAATCCTGTC  
Marmoset/1-1351 584 TAAAGCCTTATGCCAGTGACTCCCAAGCAGTCTCCAGTAAACACAAACTATCCAATC  
Squirr mky/1-1332 592 TAAAGCCTCGTGCCTAGTGAATCCCAAGGAGTCTCGAGTAAATAAAAACAATCCTATC  
Orangutan/1-1461 777 TGACACTTGCCTGACCTCT-AAGTCGTTCAAAGCTTTAGCTCAACTTTGATCC-ATCTG  
Gorilla/1-1349 685 TGACACTTGCCTGACCTCT-AAGTCGTTCAAAGCTTTAGCTCAACTTCGATCC-ATCTG  
Chimpanzee/1-1404 739 TGACACTTGCCTGACCTCT-AAGTCATTCAAAGCTTTAGCTCAACTTCGATCC-ATCTG  
Human/1-1431 766 TGACACTTGCCTGACCTCT-AAGTCATTCAAAGCTTTAGCTCAACTTCGATCC-ATCTG  
Gibbon/1-1400 800 -----  
Baboon/1-1380 670 TGACACTTGCCTGACACTCT-AAGTTGTTCAAAGCTTTAACTCAACTTTGATCC-ATCTG  
Rhesus/1-1376 670 TGACACTTGCCTGACACTCT-AAGTTGTTCAAAGCTTTAACTCAACTTTGATCC-ATCTG  
Tarsier/1-1346 631 TGACACTTGCCTAAC--TCTTAAGTCTTCAAAGCTTTAGCTCAACTTTGAACCCATCTG  
Marmoset/1-1351 644 CGACACTGCCTGACCTCT-AAGTCGTTCAAAGCTTTAGCTCAACTTTGATCCC-TTTG  
Squirr mky/1-1332 652 TGACACTGCCTGACCTCT-AAGTTGTTCAAAGCTTTAGCTCAACTTTGATCCC-TCTG

Orangutan/1-1461 835 AGTTGCCATAGTGGACCCCACTCAGAGCTGCGTCCCTCCCTTGACCCCAAGGCTGGT---C  
Gorilla/1-1349 743 AGCTGCCATAGTGGACCCCACTCAGAGCTGCGTCCCTCCCTTGACCCCAAGGCTGGT---C  
Chimpanzee/1-1404 797 AGCTGCCATAGTGGACCCCACTCAGAGCTGCGTCCCTCCCTTGACCCCAAGGCTGGT---C  
Human/1-1431 824 AGCTGCCATAGTGGACCCCACTCAGAGCTGCGTCCCTCCCTTGACCCCAAGGCTGGT---C  
Gibbon/1-1400 800 -----CTGCGTCCCTCCCTTGACCCCAAGGCTGGTGGTC  
Baboon/1-1380 728 AGCTGCCATAGTGGACCCCACTCAGAGCTGCGTCCCTCCCTTGACCCCAAGGCTGGT---C  
Rhesus/1-1376 728 AGCTGCCATAGTGGACCCCACTCAGAGCTGCGTCCCTCCCTTGACCCCAAGGCTGGT---C  
Tarsier/1-1346 689 AGCTTCCATAATGAACCCTACTCATAGCTATGTCCCTCCCTTGATCCCAGGCCAGT---C  
Marmoset/1-1351 702 AGCTGCCATAGTGGGCCCCCACTCAGAGCTGTGT-----C  
Squirr mky/1-1332 710 AGCCGCCATAGTGGGCCCCCACTCAGA ACTTCGT-----C

Orangutan/1-1461 892 CCTGCCACTCCCCTGCCCCGTGCTACTGACACACGTTTCCTCCTCCCTCAGGCAGGAGTGG  
Gorilla/1-1349 800 CCTGCCACTCCCCTGCCCCGTGCTACTGACACACGTTTCCTCCTCCCTCAGGCAGGAGTGG  
Chimpanzee/1-1404 854 CCTGCCACTCCCCTGCCCCGTGCTACTGACACATGTTTCCTCCTCCCTCAGGCAGGAGTGG  
Human/1-1431 881 CCTGCCACTCCCCTGCCCCGTGCTACTGACACATGTTTCCTCCTCCCTCAGGCAGGAGTGG  
Gibbon/1-1400 833 CCTGCCACTCCCCTGCCCCGTGCTACTGACACACGTTTCCTCCTCCGTCAGGCAGGAGTGG  
Baboon/1-1380 785 CCTGCCACTCCCCTGCCCCGTGCTACTGGCACATGTTTCCTCCCTCAGGCAGGAGTGG  
Rhesus/1-1376 785 CCTGCCACTCCCCTGCCCCGTGCTACTGGCACATGTTTCCTCCTCC-TCAGGCAGGAGTGG  
Tarsier/1-1346 746 CCTGCCA--CCCCTACCTCTGTCAACACACATGTTTCCTCCTCCCTCGGGCAGGAATGA  
Marmoset/1-1351 736 CCTGCCACTCCCCTGCTCCTGTCACTGACATGTGTTTCCTCCTCCCTCAGGCAGGAGTGG  
Squirr mky/1-1332 744 CCTGCCACTCCCCTGCCCCGTGCTACTGACACGTGTTTCCTCCTCCCTCAGGCAGGAGTGT

Orangutan/1-1461 952 GACCTCCCAGCCTCCTCCTGGGGCCTCCACTCA-----  
Gorilla/1-1349 860 -ACCTCCCAGCCTCCTCCTGGGGCCTCCACTCA-----  
Chimpanzee/1-1404 914 GACCTCCCAGCCTCCTCCTGGGGCCTCCACTCA-----  
Human/1-1431 941 GACCTCCCAGCCTCCTCCTGGGGCCTCCACTCA-----  
Gibbon/1-1400 893 GACCTCCCAGCCTCCTCCTGGGGCCTCCACTCA-----  
Baboon/1-1380 845 GACCTCCCAGCCTCCTCCTGGGGCCTCCACTCA-GCCAGCCAAGACAGCTCCTCCAAGCC  
Rhesus/1-1376 844 GACCTCCCAGCCTCCTCCTGGGGCCTCCACTCA-GCCAGCCAAGACAGCTCCTCCAAGCC  
Tarsier/1-1346 804 GACCTCCCAGTCTCCT---GGGGCAT-CACTCAAGTCAGCCAAGGCTT-TCCTGG---CA  
Marmoset/1-1351 796 GACCTCCCAGCCTCCTCCTGGGGCCTCCACTCA-GCCAGCCAAGACAGCTCCTCCAAGCA  
Squirr mky/1-1332 804 GACCTCCCAGCCTCCTTCTGGGGCCTCCACTCA-GCCAGCTAAGACAGCTCCTCCAAGCG

Orangutan/1-1461 985 ---GAATGTCAGGATGAGCAGGGTCTTAGGAGGCCCTTGGTGCAGCCTTCCC-TTCCCAC  
Gorilla/1-1349 892 ---GAATGTCAGGATGAGCAGGGTCTTAGGAGGCCCTTGGTGCAGCCTTCCC-TTCCCAC  
Chimpanzee/1-1404 947 ---GAATGTCGGGATGAGCAGGGTCTTAGGAGGCCCTGTTGGTGCAGCCTTCCC-TTCCCAC

Human/1-1431 974 ---GAATGTCAGGATGAGCAGGGTCC TAGGAGGCCCTCTGGTGCAGCCTTCCC-TTCCCAC  
Gibbon/1-1400 926 ---GAATGTCAGGATGAGCAGGGTCC TAGGAGGCCCCCTGGTGCAGCCTTCCC-TTCCCAC  
Baboon/1-1380 904 CTAGAATGTCAGGATGAGCAGGGTCC TAGGAGGCCCCCTGGTGCAGCCTTCCC-TTCCCTAC  
Rhesus/1-1376 903 CTGGAATGTCAGGATGAGCAGGGTCC TAGGAGGCCCCCTGGTGCAGCCTTCCC-TTCCCTAC  
Tarsier/1-1346 856 TCAGAATGTCAGCGTTGGCAGGGTCCCTGGAGGCCACTTAGTACACCACCCCTTCCCTAT  
Marmoset/1-1351 855 CTAGAATGTCAGGATGAGCAGCATCCCAGAGGCCCTCTGTGCAGGCTTCCC-TTCCCAT  
Squirr mky/1-1332 863 CTAGAATGTCAGGATGAGCAGCGTCCCAGGAGGCCCCCTGTGTAACCTTCCC-TTCCCAT

Orangutan/1-1461 1041 CATCCATGTG-CTCAAAGAGAATAAGATGGCTGGCTGGGGTACCCCGTCTTTCTTGAAT  
Gorilla/1-1349 948 CATCCATGTG-CTCAAAGAGAAT-----CACCCGTCTTTCTTGAAT  
Chimpanzee/1-1404 1003 CATCCATGTG-CTCAAAGAGAAT-----CACCCGTCTTTCTTGAAT  
Human/1-1431 1030 CATCCATGTG-CTCAAAGAGAAT-----CACCCGTCTTTCTTGAAT  
Gibbon/1-1400 982 CATCCATGTG-CTCAAAGAGAATCAGATGGCTGGCTGGG-TCACCCGTCTTTCTTGAAT  
Baboon/1-1380 963 CATCCATGTG-CTCAAATAAAATCAGATGGCTGGCTGGGGTACCCCGTCAATTTCTTGAGT  
Rhesus/1-1376 962 CATCCATGTG-CTCAAATAAAATCAGATGGCTGGCTGGGGTACCCCGTCAATTTCTTGAGT  
Tarsier/1-1346 916 CATCAATGTG-CTCAAGGAAAGTCAGATGGCCAA-TGGGGTCACTGTCTTTGCTTGAGC  
Marmoset/1-1351 914 CGTTCATGTGATTCTCAGAGAATCAGATGGCTGCCTGGGGTCACTGTCCCTTCTTGAGT  
Squirr mky/1-1332 922 CATCCGTGTGATTCTCAGAGAATCAGATGGCTGCCTGGGGTCACTGTCTTCTTGAGT  
Orangutan/1-1461 1100 GCCATGGATCATGGGGGATTTGCTGCCACACTCCTAGGCGGTCTCTTAGACATCCGTTG  
Gorilla/1-1349 989 GCCATGGATCATGGGGGATTTGCTGCCACACTCCTAGGCGGCCTCTTAGACATCCGTTG  
Chimpanzee/1-1404 1044 GCCATGGATCATGGGGGATTTGCTGCCACACTCCTAGGCGGCCTCTTAGACATCCGTTG  
Human/1-1431 1071 GCCATGGATCATGGGGGATTTGCTGCCACACTCCTAGGCGGCCTCTTAGACATCCGTTG  
Gibbon/1-1400 1040 GCCACGGATCATGGGGGATTTGCTGCCACACTCCTAGGCGGCCTCTTAGACATCCGTTG  
Baboon/1-1380 1022 GCCATGGATCATGGGGGATTTGCTGCCACACTCCTAGGCGGCCTCTTAGACATCTGTTA  
Rhesus/1-1376 1021 GCCATGGATCATGGGGGATTTGCTGCCACACTCCTAGGCGGCCTCTTAGACATCTGTTA  
Tarsier/1-1346 974 ACCATGCACAATGGGGAACTCACTAGCCACACTCCTAGGCCGCCTCCT---CATCCACTG  
Marmoset/1-1351 974 GCCATGGATCATGGGGG-TTTGCTGCGCACACTCCTAGGCGGCCTCCTAGACATCCGTTG  
Squirr mky/1-1332 982 GCAATGGATCGTGGGG-ATTTGCTGCCACACTCCTAGGCGGCCTCTGAGACATCCATTG

Orangutan/1-1461 1160 GTGCCTAACCC-AAGCATCAGTTTGGCAGAGGCTGAGTCCCTCCTCTGTACTAGATACCA  
Gorilla/1-1349 1049 GTGCCTAACCC-AAGCATCAGTTTGGCAGAGGCTGAGTCCCTCCTCTGTACTGGATACCA  
Chimpanzee/1-1404 1104 GTGCCTAACCC-AAGCATCAGTTTGGCAGAGGCTGAGTCCCTCCTCTGTACTGGATACCA  
Human/1-1431 1131 GTGCCTAACCC-AAGCATCAGTTTGGCAGAGGCCGAGTCCCTCCTCTGTACTGGATACCA  
Gibbon/1-1400 1100 GTGCCTAACCC-AAGCATCAGTTTGGCAGAGGCTGAGTCCCTCCTCTGTATTGGATACCA  
Baboon/1-1380 1082 GTGCCTAACCC-AAGCATCAGTTTGCAGAGGCTGAGTCCCTCCTCTGTACTGGGTACCA  
Rhesus/1-1376 1081 GTGCCTAACCC-AAGCATCAGTTTGCAGAGGCTGAGTCCCTCCTCTGTACTGGGTACCA  
Tarsier/1-1346 1031 GTGCCTTTCCCAAGCATCAGTTTGGCAGTGGTTGGTCCCTCTTCTGCACCAGGTACCT  
Marmoset/1-1351 1033 GTACCTAATCC-AAGCATCAGTTTGGCAGAGGCTG--TCCCTCCTCTGTACTGGGTACCA  
Squirr mky/1-1332 1041 GTGCCTAACCC-AAGCATCAGTTTGGCAGAGGCTG--TCCCTCCTCTGTACTGGGTACCA

Orangutan/1-1461 1219 GGTACAGCTTCCGTAGGGATGGGGAGATACCTGGCCCAGGGAGGAGATGAGGAGCAGCCCG  
Gorilla/1-1349 1108 AGTCAGCTTCCGTAGGGATGGGGAGACACCTGGCCCAGGGAGGAGATGAGAACAGCCGG  
Chimpanzee/1-1404 1163 CATACAGCTTCCGTAGGGATGGGGAGACACCTGGCCCAGCGAGGAGATGAGAACAGCCCG  
Human/1-1431 1190 AGTCAGCTTCCATAGGGATGGGGAGACACCTGGCCCAGGGAGGAGATGAGAACAGCCCG  
Gibbon/1-1400 1159 AGTCAGCTTCCGTAGGGATGGGGAGACACCTGGCCCAGGGAGGAGATGAGGAGCAGCCCG  
Baboon/1-1380 1141 AGTCAGCTTCTGTAGGGATGGGGAGACACCTGGCCCAGGGAGGAGATGAGGAGCAGCCCG  
Rhesus/1-1376 1140 AGTCAGCTTCTGTAGGGATGGGGAGACACCTGGCCCAGGGAG--ATGAGGAGCAGCCCG  
Tarsier/1-1346 1091 AGTCAACTTCTATAGTGTAGGGAGACACTTGGCCCAGAAAG-ACA--AGAAGCAGACCA  
Marmoset/1-1351 1090 AGTCAGCTTCTGTAGGGATGGGGAGACACCTGGCACAGAGAGGAGATGAGGAGCAGGCCA  
Squirr mky/1-1332 1098 GGTACAGCTTCTGTAGGGATGGGGAGACACCTGGCACAGGAAGGAGATGAGGAGCAGGCCG

Orangutan/1-1461 1279 GATGGTGCCTACA---TATGTCAGAGAGCAGGGCAGGAAGGGATCAGTGTGGATGCCAATG  
Gorilla/1-1349 1168 GATGGTGCCTACA---TATGTCAGAGAGCAGGGCAGGAAGGGATCAGTGTGGATGCCAATG  
Chimpanzee/1-1404 1223 GATGGTGCCTACA---TATGTCAGAGAGCAGGGCAGGAAGGGATCAGTGTGGCTGCCAATG  
Human/1-1431 1250 GATGGTGCCTACA---TATGTCAGAGAGCAGGGCAGGAAGGGATCAGTGTGGCTGCCAATG  
Gibbon/1-1400 1219 GATGGTGCCTACG---TATGTCAGAGAGCAGGGCAGGAAGGGATCAGTGTGGATGCCAGTG  
Baboon/1-1380 1201 GATGGTGCCTACA---TATGTCAGAGAGCAGGGCAGGAAGGGATCAGTGTGGATGCCAATG  
Rhesus/1-1376 1197 GATGGTGCCACT---TATGTCAGAGAGGAGGGCAGGAAGGGATCAGTGTGGATGCCAATG  
Tarsier/1-1346 1148 G---GTGGTAATGGGTATGTTAGGGTGCAGGGCAGGGAGGGTCTGGTGTGGATGCAGATG  
Marmoset/1-1351 1150 G---GTGCTACA---TATGTCAGAGAGCAGGGCAGTAAGGGATCAGTGTGGATGCCAGTG  
Squirr mky/1-1332 1158 G---GTGCTACA---TATGTCAGAGAGCAGGGCAGGAAGGGATCAG-GTGGATGCCAGTG

Orangutan/1-1461 1336 GTCAGGAGGGCGCCATGGAGTGAA-----CCATGACCC  
Gorilla/1-1349 1225 GTCAGGAGGGTGCCATGGAGTGAA-----CCATGGCCC  
Chimpanzee/1-1404 1280 GTCAGGAGGGCGCCATGGAGTGAA-----CCATGGCCC  
Human/1-1431 1307 GTCAGGAGGGCGCCATGGAGTGAA-----CCATGGCCC  
Gibbon/1-1400 1276 GTCAGGAGGGTGCCATGGAGTGAA-----CCATGGCCC  
Baboon/1-1380 1258 GTCAGGAGGGCGCCATGGAGTGAA-----CCATGGCCC  
Rhesus/1-1376 1254 GTCAGGAGGGCGCCATGGAGTGAA-----CCATGGCCC  
Tarsier/1-1346 1205 GTCAGGAAGACACCCAGAGAGAAAGAACCATGACTCCAGCAAGTAACTCCCTCACCC  
Marmoset/1-1351 1204 GTCAGGAGGGCGCCG-GGGGTGAA-----CCATGACCC  
Squirr mky/1-1332 1211 GTCAGGAGGGTGCTGTGGGGTGAA-----CCAGAGGCC

Orangutan/1-1461 1369 CTGCCT-CCTCGCCAGCAGCTCCTCTGGGGAGGATACTCAAGACCCCCGGTCTCTCTCCT  
Gorilla/1-1349 1258 CTGCCT-CCTCACCAGCAGCTCCTCTGGGGCTGATACTCAAGATCCCCGTCTCTCTCCT  
Chimpanzee/1-1404 1313 CTGCCT-CCTCACCAGCAGCTCCTCTGGGGCTGATACTCAAGACCCCCGTCTCTCTCCT  
Human/1-1431 1340 CTGCCT-CCTCACCAGCAGCTCCTCTGGAGCTGATACTCAAGACCCCCGTCTCTCTCCT  
Gibbon/1-1400 1309 CTGCCT-CCTCACCAGCAGCTCCTCTGGGGCTGATACTCAAGACCCCCGTCTCTCTCCT  
Baboon/1-1380 1291 CTGCCT-CCTCATCAGCAGCTCCTCTGGGGCTGATACTCAAGATCCC--GTCTCTCTCCT  
Rhesus/1-1376 1287 CTGCCT-CCTCATCAGCAGCTCCTCTGGGGCTGATACTCAAGATCCC--GTCTCTCTCCT  
Tarsier/1-1346 1265 CTGCCTACCCACCAGTGGTTTCTCCGGGGCTGTTTACAAGACCCC--ACCTCTCTCCT  
Marmoset/1-1351 1236 CTGCCC-CCTCACCAGCAGCTCCTCTGGAGCTGAAACTCAAGACCCT--GTCTCTCTCCT  
Squirr mky/1-1332 1244 GTGCC--CCTCACGAGCAGCTCCTCTGGGGCTGATACTCAAGACCCC--GTCTCTCTCCT

Orangutan/1-1461 1428 CACCCTCCTCTACCGGCTGC--CTCGGCTG-----GCTCAG  
Gorilla/1-1349 1317 CACCCTCCTCT-CCCGCTGC--CTCGGCTG-----GCTCAG  
Chimpanzee/1-1404 1372 CACCCTCCTCT-CCCGCTGC--CTCGGCTG-----GCTCAG  
Human/1-1431 1399 CACCCTCCTCT-CCCGCTGC--CTCGGCTG-----GCTCAG  
Gibbon/1-1400 1368 CAACCTCTTCT-CCCGCTGC--CTCGGCTG-----GCTCAG  
Baboon/1-1380 1348 CACCCTCCTCT-CTCGCTGC--CTCGGCTG-----GCTCAG  
Rhesus/1-1376 1344 CACCCTCCTCT-CTCGCTGC--CTCGGCTG-----GCTCAG  
Tarsier/1-1346 1323 CT-----CCCCCTGC--CTCGGCTG-----GCTCAG  
Marmoset/1-1351 1293 CTGCCTCCTCT-CCCGCTGCGGCTCAGGTGTTTCGATGCCCGGGACTGCAGGTCTGCCAG  
Squirr mky/1-1332 1300 CTGCCTCCTCT-CCGGCTGC--CTCGGCTG-----GCTCAG
